# Supplementary material for: Automatic optimization of temporal monitoring schemes dealing with daily water contaminant concentration patterns
Source: Royal Society of Chemistry journal article supplement (doi:10.1039/d2ew00089j), 2022-01-01
Supplement: d2ew00089j1.pdf [file d2ew00089j1.pdf]

## **Automatic optimization of temporal monitoring schemes dealing with daily water contaminant concentration patterns**

### Supplementary material

Number of pages: 9; number of algorithms: 2; number of figures: 11

M. Gabrielli<sup>1</sup>, F. Trovò<sup>2</sup>, M. Antonelli<sup>1\*</sup>

<sup>1</sup>Dipartimento di Ingegneria Civile e Ambientale (DICA), Politecnico di Milano, Piazza Leonardo da Vinci 32, Milano, 20133, Italy

<sup>2</sup>Dipartimento di Elettronica, Informazione e Bioingegneria (DEIB), Politecnico di Milano, Piazza Leonardo da Vinci 32, Milano, 20133, Italy

\* Corresponding author: [manuela.antonelli@polimi.it](mailto:manuela.antonelli@polimi.it)

The pseudo-code of Seq(GP-UCB-SW) is presented in Algorithm S1. It requires as input the set of possible sampling instants  $\{a_1, \dots, a_n\}$ , the length of the sliding window SW, the time horizon of the monitoring campaign T and the first sampling instant  $a_0$ . At first, it initializes the GP and sets the next sampling instant *nextSample* equal to  $a_0$ . During the entire time horizon, if the available sampling instant  $a$  is equal to *nextSample*, then, sampling is performed, retrieving the sample concentration  $C_a$ . Afterwards, the samples collected in the days included in SW are selected and used to fit the GP. The fitted GP is, then, used to derive the upper and, eventually, lower confidence bounds (UCB and LCB) which are used to select the next sampling instant.

Algorithm S1. Pseudo-code of the Seq(GP-UCB-SW) algorithm. Pseudo-commands after “//” indicate variation of the algorithm for targeting maximum concentration variations.

```

1: Input: Possible sampling instants  $\{a_1, \dots, a_n\}$ , sliding window length SW,
   time horizon T, first sampling instant  $a_0$ 
2: Initialize GP
3: nextSample  $\leftarrow a_0$ 
4: for  $t \in \{1, \dots, T\}$  do
5:   for  $a \in \{a_1, \dots, a_n\}$  do
6:     if  $a = \text{nextSample}$  then
7:       Sample  $a$  and obtain measurement  $C_a$ 
8:       Select samples collected after  $t - SW$ 
9:       Fit GP
10:      Estimate UCB // Estimate UCB and LCB
11:      Select next sampling instant:
           
$$\begin{cases} \text{nextSample} \leftarrow \text{argmax}(UCB) \\ // \text{nextSample} \leftarrow \text{argmax}(UCB) \text{ and } \text{argmin}(LCB) \end{cases}$$

12:     end if
13:   end for
14: end for

```

The pseudo-code of Seq(GP-UCB-CD) is presented in Algorithm S2. It requires as input the set of possible sampling instants  $\{a_1, \dots, a_n\}$ , the length of the training window TW, the exploration probability  $\alpha$ , the time horizon of the monitoring campaign T and the first sampling instant  $a_0$ . At first, it initializes the GP and the change point models (CPMs) regarding the maximum daily concentrations (CPM<sub>max</sub>) and, eventually, the ones regarding the minimum daily concentrations (CPM<sub>min</sub>) and the maximum daily variation (CPM<sub>delta</sub>). It also sets the day of the first change point (CP) as 0 and the next sampling instant *nextSample* as  $a_0$ . At the beginning of each day, the vector *dailySamples* is initialized to store the concentrations of the samples collected during the day. Then, if the available sampling instant  $a$  is equal to *nextSample*, then, sampling is performed, retrieving the sample concentration  $C_a$  which is added to the *dailySamples* vector. Afterwards, the samples collected after the previous changepoint are selected and used to fit the GP. The fitted GP is, then, used to derive the upper and, eventually, lower confidence bounds (UCB and LCB). With probability  $1 - \alpha$  the next sampling instant is selected based on UCB and, eventually, LCB, while with probability  $\alpha$  the next sampling instant is selected at random among the available options. At the end of each day after the training window is elapsed, maximum and, eventually, minimum concentrations and the maximum daily variation are derived from the *dailySamples* vector and used to update the CPMs. In case a CPM detects the presence of a changepoint, CP is set equal to the current day  $t$ . Successively, all the active CPMs are resetted.

Algorithm S2. Pseudo-code of the Seq(GP-UCB-CD) algorithm. Pseudo-commands after “//” indicate variation of the algorithm for targeting maximum concentration variations.

```

1: Input: Possible sampling instants  $\{a_1, \dots, a_n\}$ , training window length
   TW, exploration probability  $\alpha$ , time horizon T, first sampling instant  $a_0$ 
2: Initialize GP
3: Initialize  $CPM_{max}$  // Initialize  $CPM_{max}$ ,  $CPM_{min}$ ,  $CPM_{delta}$ 
4:  $CP \leftarrow 0$ 
5:  $nextSample \leftarrow a_0$ 
6: for  $t \in \{1, \dots, T\}$  do
7:    $dailySamples \leftarrow \{\}$ 
8:   for  $a \in \{a, \dots, a_n\}$  do
9:     if  $a = nextSample$  then
10:      Sample  $a$  and obtain measurement  $C_a$ 
11:       $dailySamples \leftarrow dailySamples \cup C_a$ 
12:      Select samples collected after CP
13:      Fit GP
14:      Estimate UCB // Estimate UCB and LCB
15:      Select next sampling instant:
          
$$\begin{cases} nextSample \leftarrow \operatorname{argmax}(UCB) \text{ w.p. } 1 - \alpha \\ // nextSample \leftarrow \operatorname{argmax}(UCB) \text{ and } \operatorname{argmin}(LCB) \text{ w.p. } 1 - \alpha \\ nextSample \leftarrow \operatorname{rand}(\{a, \dots, a_n\}) \text{ w.p. } \alpha \end{cases}$$

16:     end if
17:   end for
18:   if  $t - CP > TW$  then
19:      $maxObs \leftarrow \max(dailySamples)$ 
       //  $maxObs \leftarrow \max(dailySamples)$ ,  $minObs \leftarrow \min(dailySamples)$ ,
       //  $deltaObs \leftarrow maxObs - minObs$ 
20:     Update  $CPM_{max}$ 
       // Update  $CPM_{max}(maxObs)$ ,  $CPM_{min}(minObs)$ ,
       //  $CPM_{delta}(deltaObs)$ 
21:     if  $CPM_{max}$  detects change
       //  $CPM_{max}$ ,  $CPM_{min}$  or  $CPM_{delta}$  detects change then
22:        $CP \leftarrow t$ 
23:       Reset  $CPM_{max}$  // Reset  $CPM_{max}$ ,  $CPM_{min}$  or  $CPM_{delta}$ 
24:     end if
25:   end if
26: end for

```

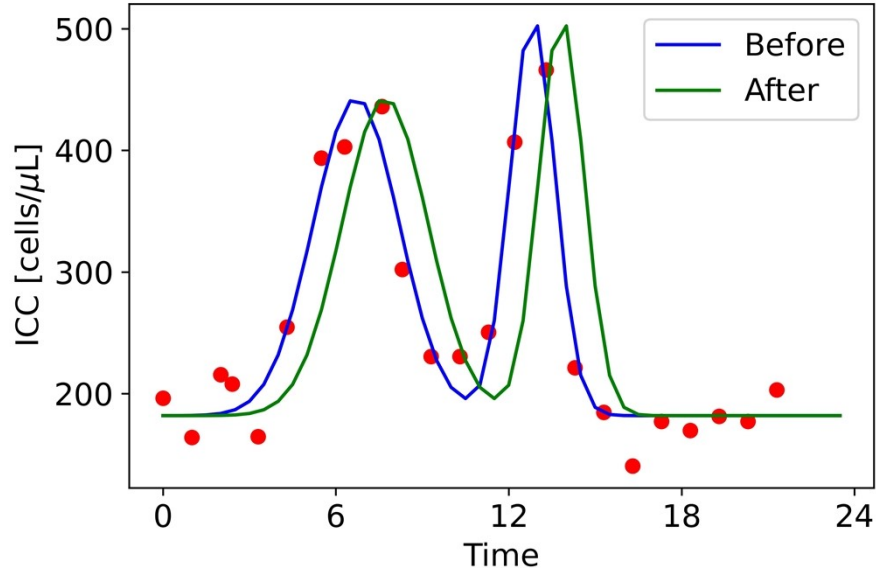

Figure S1. ICC measurements obtained from Nescerecka et al.,<sup>1</sup> shown as red dots, and fitted average pattern, indicated with a blue line. The green line indicates the shape of the pattern after the abrupt change.

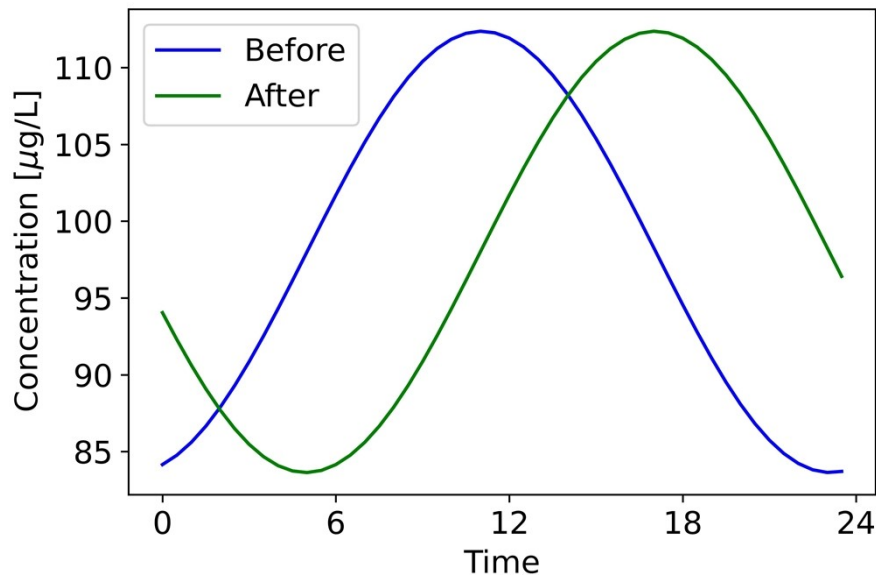

Figure S2. Average THMs concentration pattern obtained from the model developed by Chaib and Moschandreas<sup>2</sup>, in blue, and pattern after the gradual change, in green.

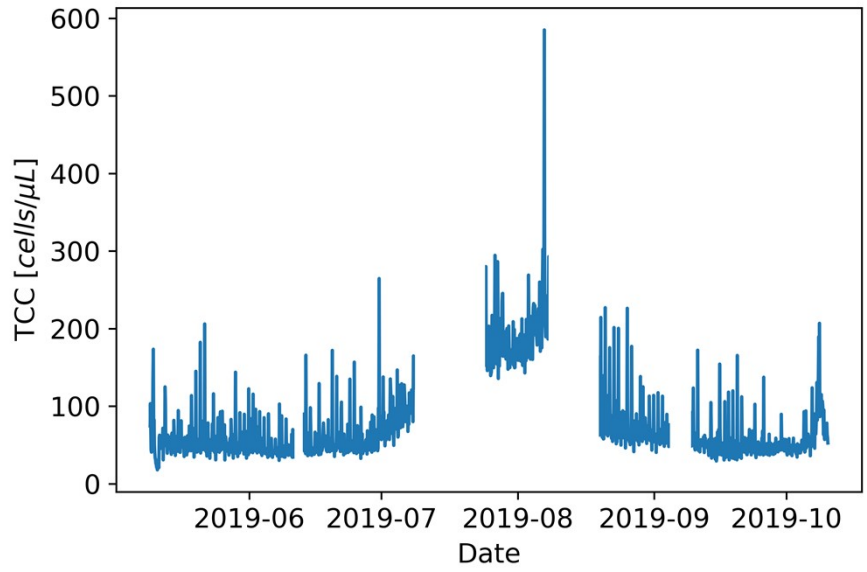

Figure S3. TCC measurements obtained from Gabrielli et al.<sup>3</sup>.

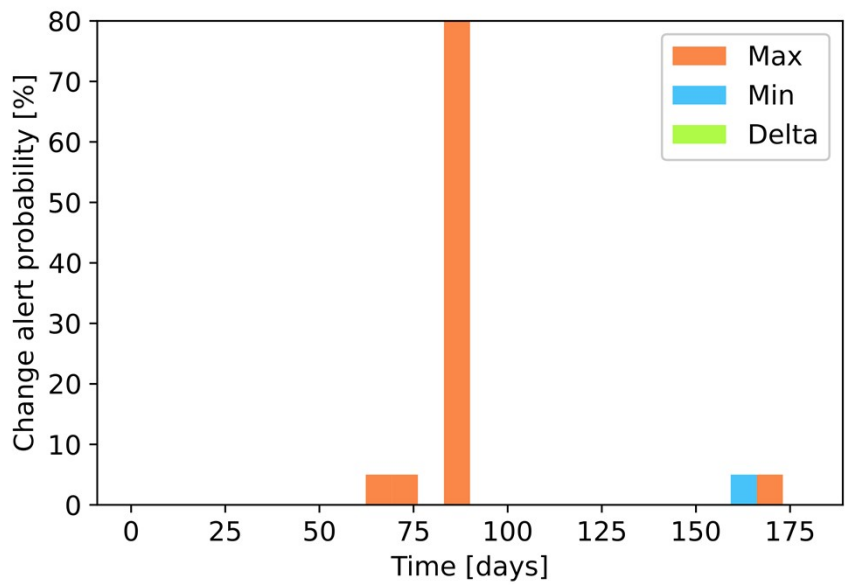

Figure S4. Histogram of the change detection alerts provided by Seq(GP-UCB-CD) in the ICC synthetic scenario.

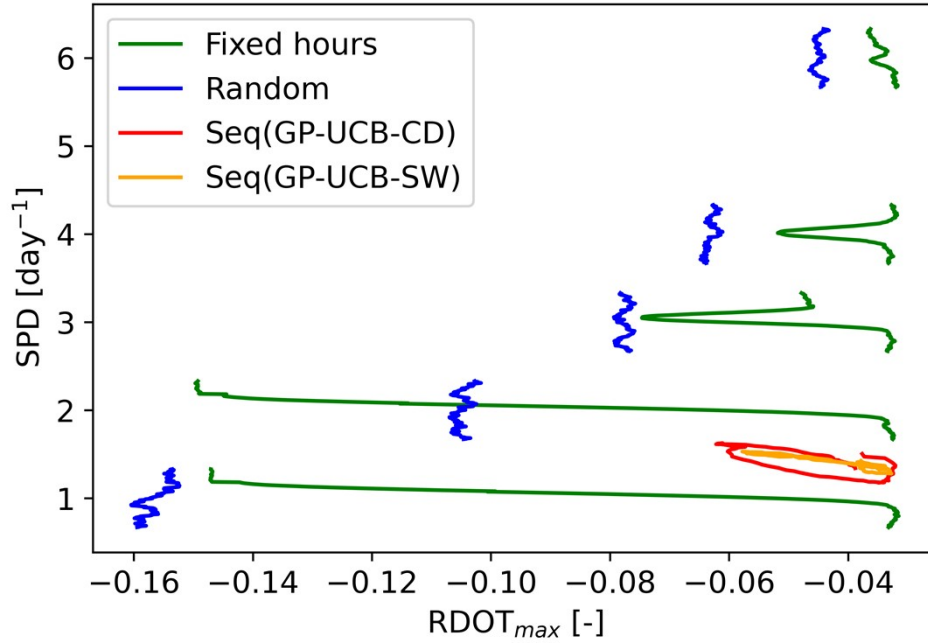

Figure S5. Average performances of tested monitoring schemes along the THMs synthetic scenario (rolling mean,  $n = 25$ ). To show the temporal variation of the  $RDOT_{max}$  obtained by the traditional schemes along the gradual pattern change a vertical displacement was applied at each SPD value. For each SPD value, the temporal  $RDOT_{max}$  evolution is to be read vertically moving from the lower to the higher SPD values. To avoid clutter only the fixed-time sampling instants combination with the best performances before the pattern change was shown. The proposed algorithms' results were obtained with the following algorithms parameterization:  $SW = 30$  d,  $TW = 30$  d,  $\alpha = 0.1$ .

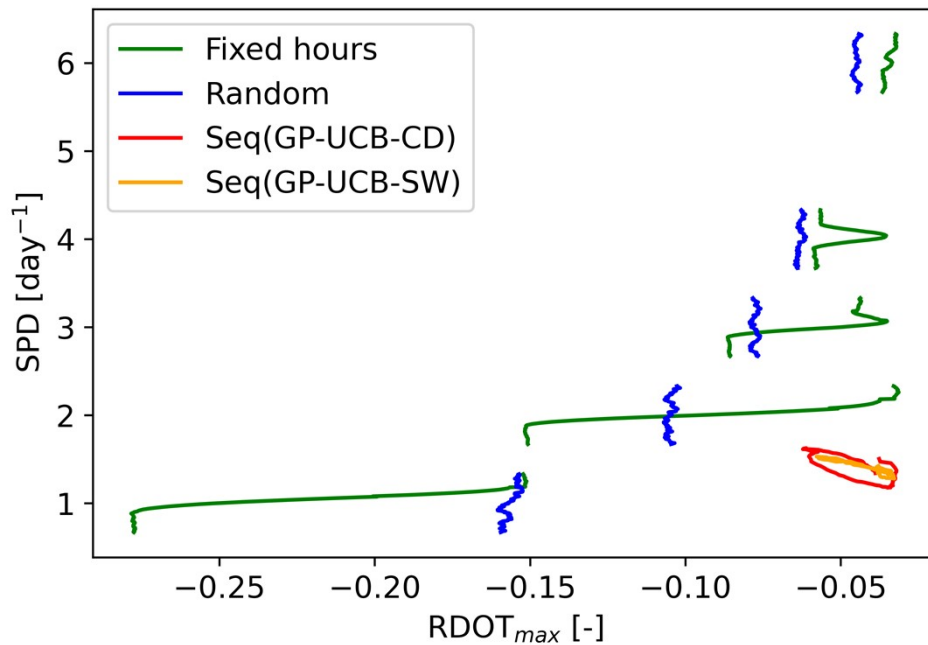

Figure S6. Average performances of tested monitoring schemes along the THMs synthetic scenario (rolling mean,  $n = 25$ ). To show the temporal variation of the  $RDOT_{max}$  obtained by the traditional schemes along the gradual pattern change a vertical displacement was applied at each SPD value. For each SPD value, the temporal  $RDOT_{max}$  evolution is to be read vertically moving from the lower to the higher SPD values. To avoid clutter only the fixed-time sampling instants combination with the worst performances before the pattern change was

shown. The proposed algorithms' results were obtained with the following algorithms parameterization: SW = 30 d, TW = 30 d,  $\alpha = 0.1$ .

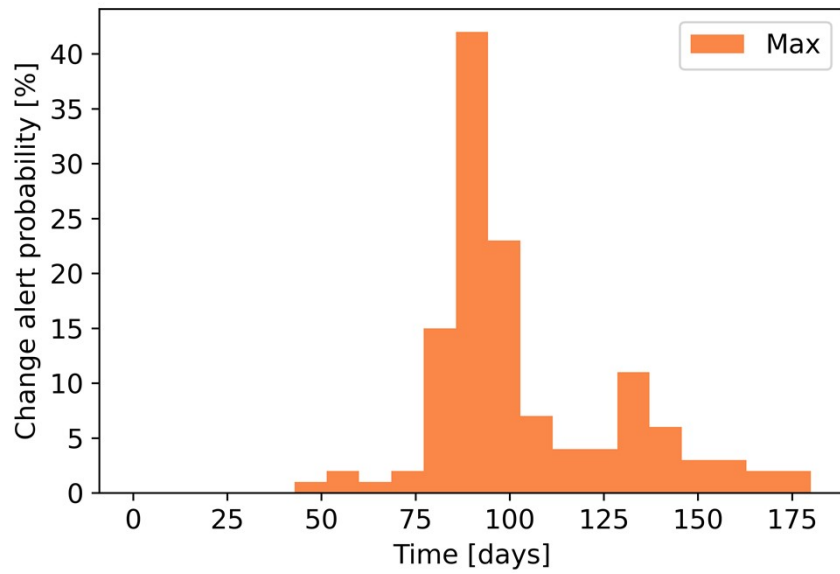

Figure S7. Histogram of the change detection alerts provided by Seq(GP-UCB-CD) in the THMs synthetic scenario.

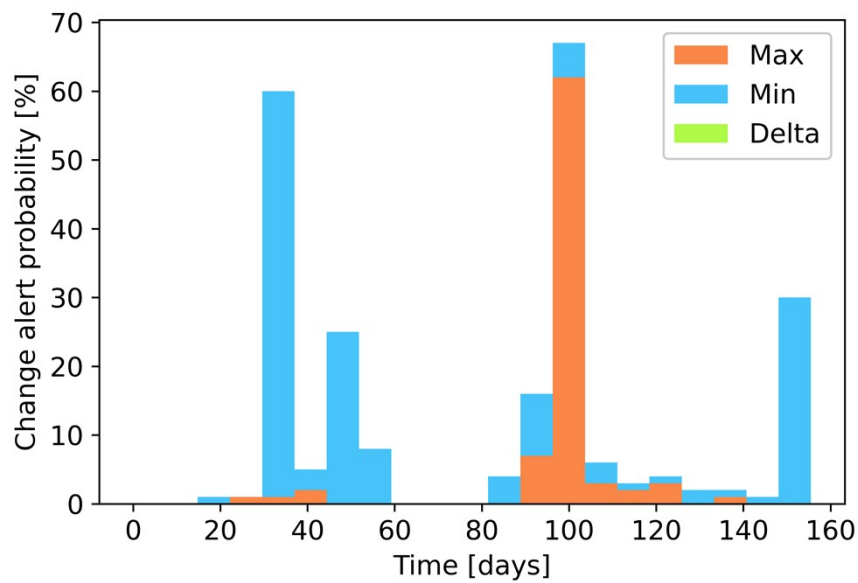

Figure S8. Histogram of the change detection alerts provided by Seq(GP-UCB-CD) in the real-world scenario.

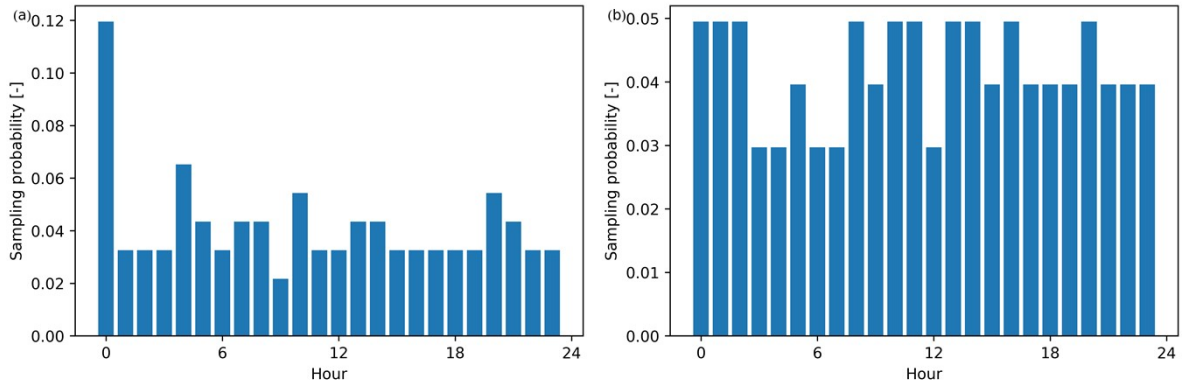

Figure S9. Sampling frequency histograms of Seq(GP-UCB-SW) in case of uniform concentration pattern characterized by minimum (a) and maximum (b) uniformity.

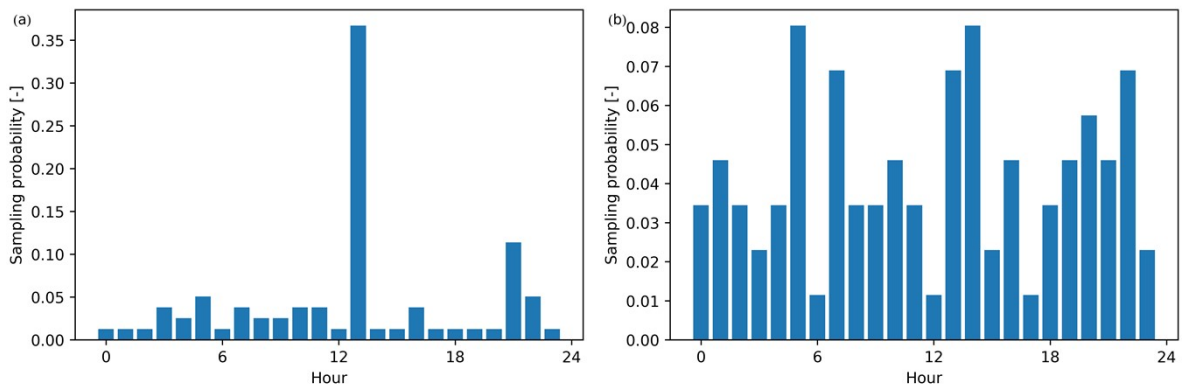

Figure S10. Sampling frequency histograms of Seq(GP-UCB-CD) in case of uniform concentration pattern characterized by minimum (a) and maximum (b) uniformity.

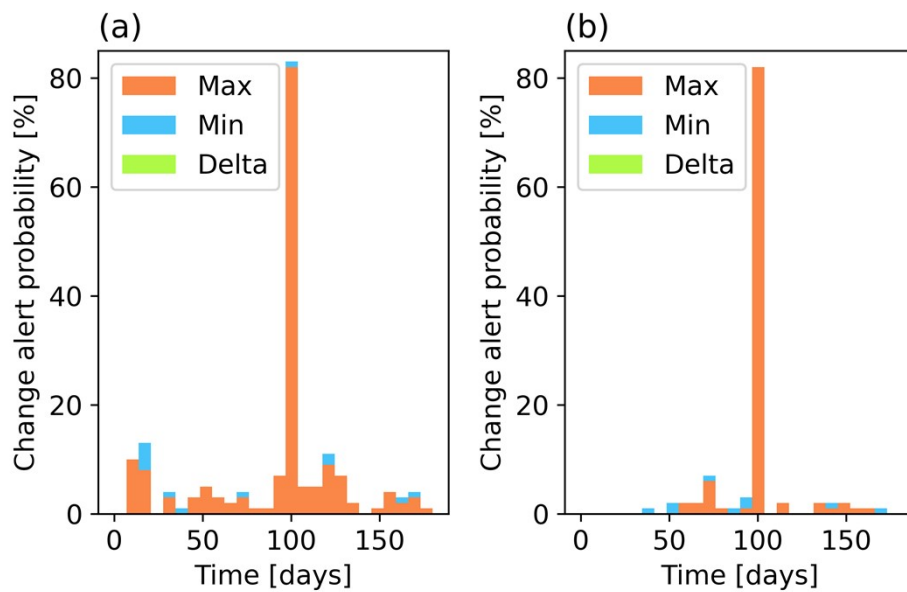

Figure S11. Histograms regarding the change detection probability obtained with a training window equal to 10 d (a) or 30 d (b).



## References

- 1 A. Nescerecka, J. Rubulis, M. Vital, T. Juhna and F. Hammes, Biological Instability in a Chlorinated Drinking Water Distribution Network, *PLoS ONE*, 2014, **9**, e96354.
- 2 E. Chaib and D. Moschandreas, Modeling daily variation of trihalomethane compounds in drinking water system, Houston, Texas, *Journal of Hazardous Materials*, 2008, **151**, 662–668.
- 3 M. Gabrielli, A. Turolla and M. Antonelli, Bacterial dynamics in drinking water distribution systems and flow cytometry monitoring scheme optimization, *Journal of Environmental Management*, 2021, **286**, 112151.
